# Supplementary material
Source: Springer Nature journal article supplement (https://www.springermedizin.de/resource/supplementary/12889_2014_6793_MOESM6_ESM.pdf/9499046)

National reporting

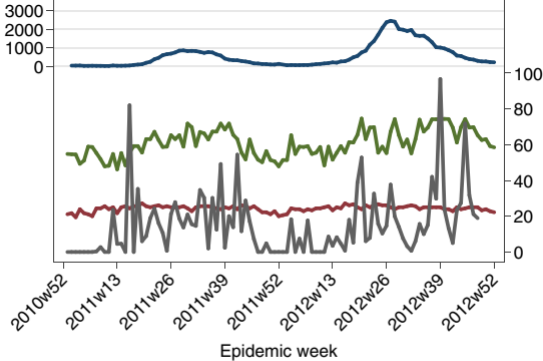

Cases

RH median, %

Temp min., °C

Rain max., mm

Supplement: MOESM6 [file 9499046]
